# Supplementary material for: Mitochondrial DNA Promotes NLRP3 Inflammasome Activation and Contributes to Endothelial Dysfunction and Inflammation in Type 1 Diabetes
Source: PubMed Central journal article supplement (PMC6978691; doi:10.3389/fphys.2019.01557), 2020-01-17
Supplement: Data_Sheet_1.pdf [file Data_Sheet_1.pdf]

**Supplementary figure 1:** Cumulative concentration-response curves to Sodium Nitroprusside (SNP), endothelium-independent vasodilator, in resistance mesenteric arteries from C57BL/6 non-diabetic (control, white circles) or diabetic (T1D, black circles). Each point represent the mean  $\pm$  S.E.M.

**Supplementary figure 2:** 8-OHdG levels in (A) DNA extracted from serum and (B) mitochondrial DNA extracted from the pancreas of C57BL/6 non-diabetic (control, white circles) or diabetic (T1D, black circles) mice. Each point represents the mean  $\pm$  S.E.M. \*, P <0.05 vs. control, N = 5-7.

**Supplementary Table 1:** Body weight, blood glucose and insulin levels of the experimental groups C57BL/6 and Nlrp3<sup>-/-</sup> non-diabetic and diabetic

|                       | C57BL/6<br>non-diabetic<br>N=6 | C57BL/6<br>diabetic<br>N=7 | Nlrp3 <sup>-/-</sup><br>non-diabetic<br>N=6 | Nlrp3 <sup>-/-</sup><br>diabetic<br>N=8 |
|-----------------------|--------------------------------|----------------------------|---------------------------------------------|-----------------------------------------|
| Body weight (g)       | 25.5 $\pm$ 0.2                 | 25.3 $\pm$ 0.5             | 25.1 $\pm$ 0.7                              | 25.1 $\pm$ 0.6                          |
| Body glucose (mg/dL)  | 158 $\pm$ 0.4                  | 316 $\pm$ 1.2*             | 168 $\pm$ 1.5                               | 263 $\pm$ 1.4*                          |
| Insulin ( $\mu$ l/ml) | 32.2 $\pm$ 1.6                 | 23.9 $\pm$ 1.5*            | 30.8 $\pm$ 4.2                              | 28.5 $\pm$ 3.1                          |

Values are in mean  $\pm$  SEM; N (number); \*, P <0.05 vs. C57BL/6 non-diabetic.

**Supplementary Table 2:** Clinical and biochemical characteristics of healthy controls and patients with type 1 diabetes

| <b>Characteristics</b>    | <b>Control</b>                                      | <b>Patients with type 1 diabetes</b>                |
|---------------------------|-----------------------------------------------------|-----------------------------------------------------|
| Female (N)                | 12                                                  | 11                                                  |
| Male (N)                  | 8                                                   | 7                                                   |
| Age (years)               | 26,0 ± 1,6                                          | 27,5 ± 1,4                                          |
| Diabetes Duration (years) | /                                                   | 14,0 ± 1,6                                          |
| HbA1c (%)                 | 5,3 ± 0,3                                           | 8,6 ± 0,4                                           |
|                           | 5.3 % NGSP = 34<br>mmol/mol IFCC =<br>105 mg/dL eAG | 8.6 % NGSP = 70<br>mmol/mol IFCC =<br>200 mg/dL eAG |

Values are in mean ± SEM; N (number); HbA1c (Glycated hemoglobin); NGPS (National Glycohemoglobin Standardization Program); IFCC (International Federation of Clinical Chemistry); eAG (Estimated average glucose)
